# Supplementary material
Source: publisher site journal article supplement (https://www.spandidos-publications.com/4806/downloadSupplementary)

Figure S1. Cluster analysis of differentially expressed miRs. miR, microRNA.

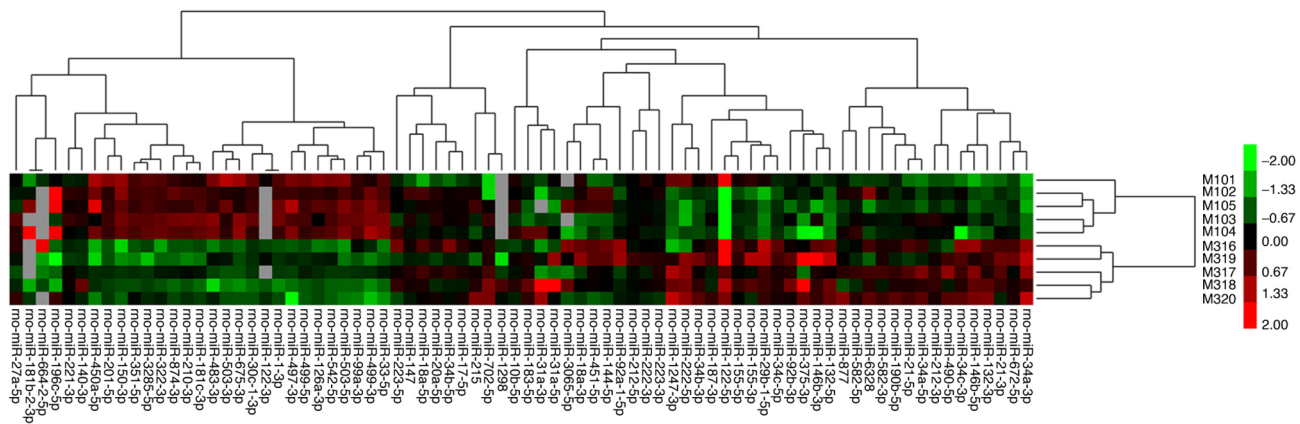

Figure S2. Correlation analysis of histopathological changes and changes in biomarkers. Curves were plotted for chronic myocardial injury at (A) 6 and (B) 8 weeks. Score indicated the degree and extent of lesion. miR, microRNA; cTn, cardiac troponin; CK, creatine kinase; FABP3, fatty acid-binding protein 3; LDH, lactate dehydrogenase.

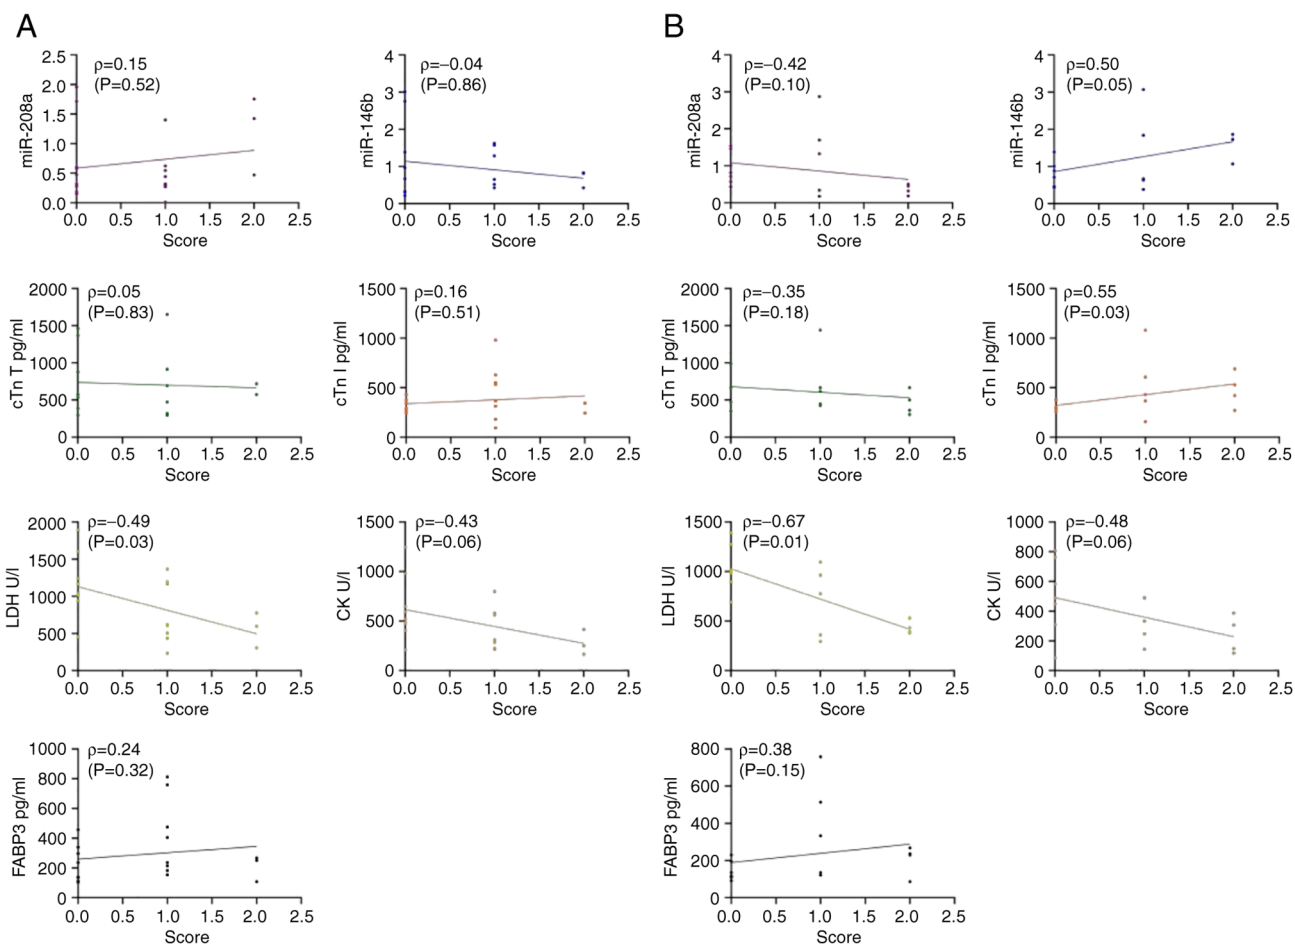

Supplement: Supplementary file 1 [file downloadSupplementary]
